# Supplementary material for: Organosulfur adsorbents by self-assembly of titania based ternary metal oxide nanofibers
Source: Royal Society of Chemistry journal article supplement (doi:10.1039/c7ta01856h), 2017-01-01
Supplement: c7ta01856h1.pdf [file c7ta01856h1.pdf]

## Supplementary Information

# Organosulfur Adsorbents by Self-Assembly of Titania Based Ternary Metal Oxide Nanofibers

Ruohong Sui, Sarah K. Carefoot, Christopher B. Lavery, Connor E. Deering, Kevin L. Lesage,  
Nancy Chou, Chelsea Rose, Robert A. Marriott

Chemistry Department, University of Calgary, 2500 University Drive, Northwest, Calgary,  
Alberta, Canada, T2L 4N1

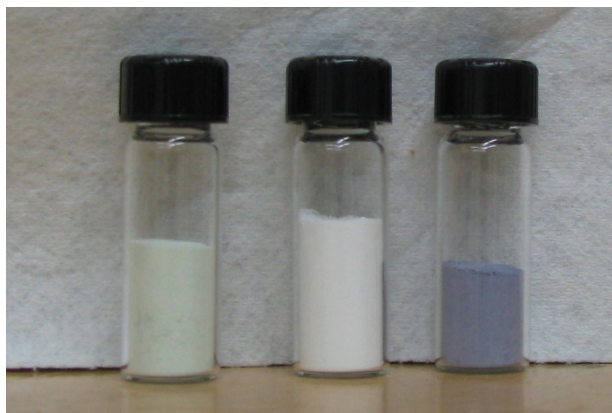

**Figure S1.** From left to right:  $\text{CuO}/\text{La}_2\text{O}_3/\text{TiO}_2$ ,  $\text{Ag}_2\text{O}/\text{La}_2\text{O}_3/\text{TiO}_2$  and  $\text{Au}/\text{La}_2\text{O}_3/\text{TiO}_2$  after calcination at  $500^\circ\text{C}$  for two hrs.

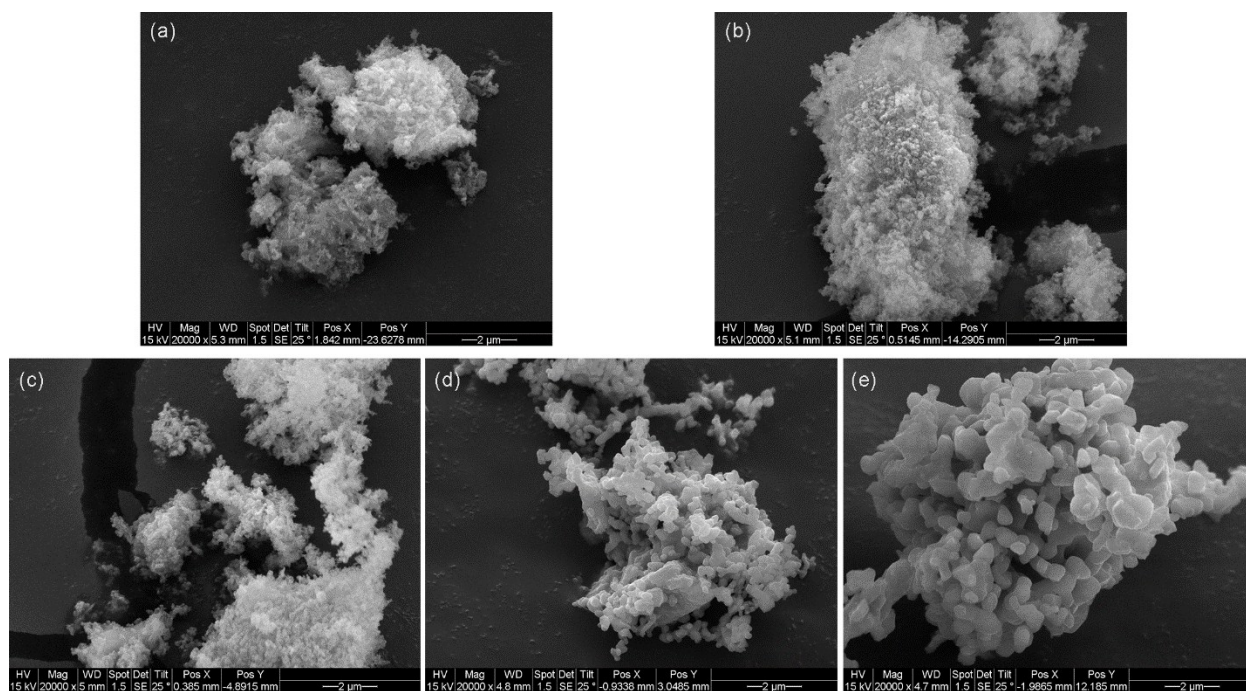

**Figure S2.** SEM images of  $\text{CuO}/\text{La}_2\text{O}_3/\text{TiO}_2$  calcined at 600 (a), 700 (b), 800 (c), 900 (d), and 1000 °C (e).

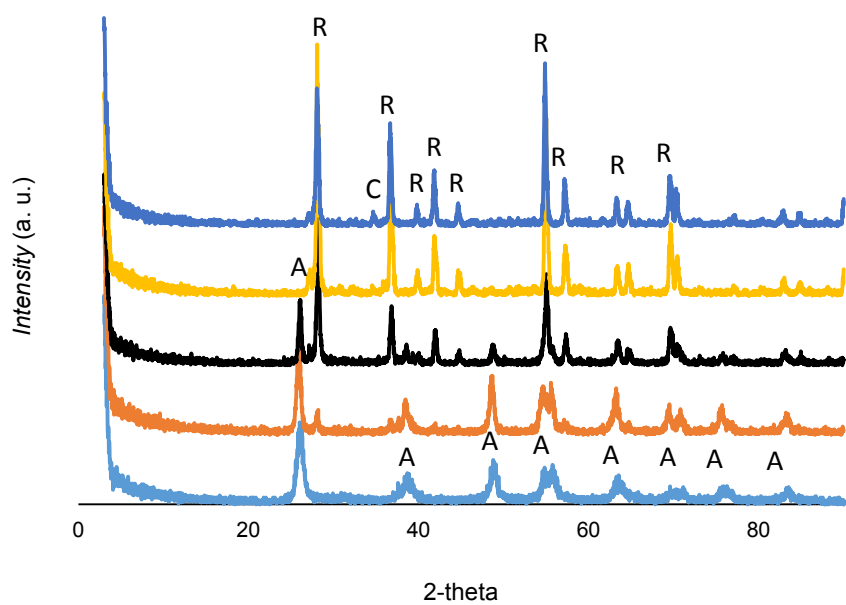

**Figure S3.** XRD patterns of CuO/La<sub>2</sub>O<sub>3</sub>/TiO<sub>2</sub> calcined at 600 °C (baby blue), 700 °C (orange), 800 °C (black), 900 °C (yellow), and 1000 °C (blue).

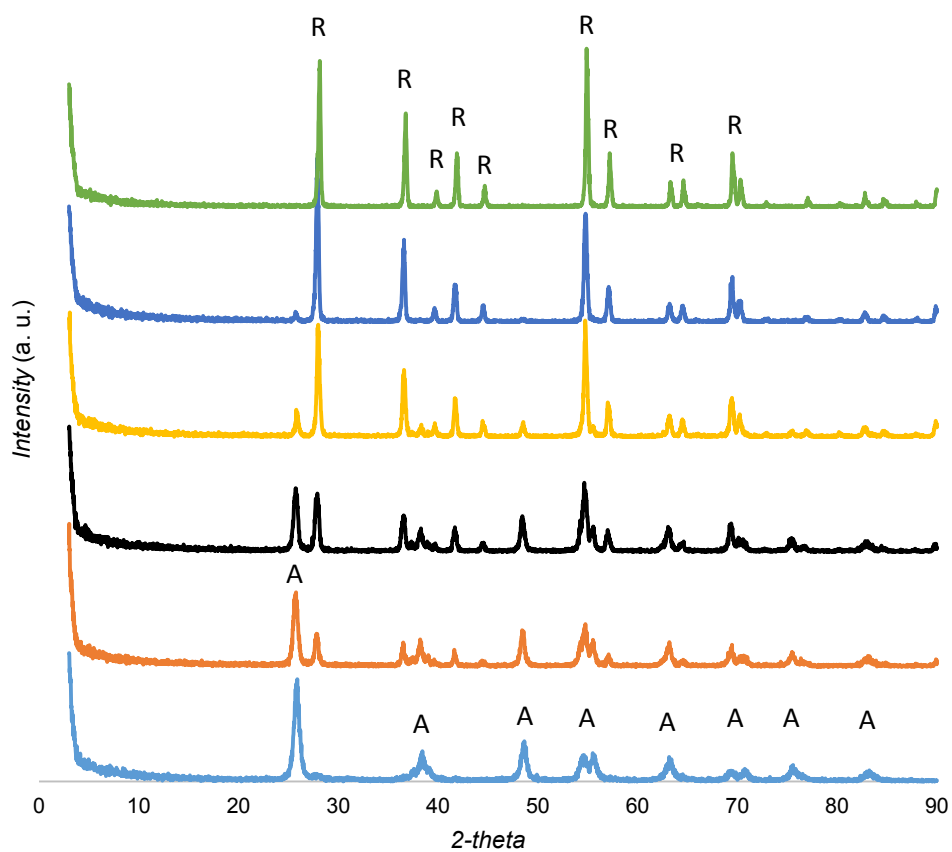

**Figure S4.** XRD patterns of TiO<sub>2</sub> nanofibers calcined at 500 °C (baby blue), 600 °C (orange), 700 °C (black), 800 °C (yellow), 900 °C (blue), and 1000 °C (green).

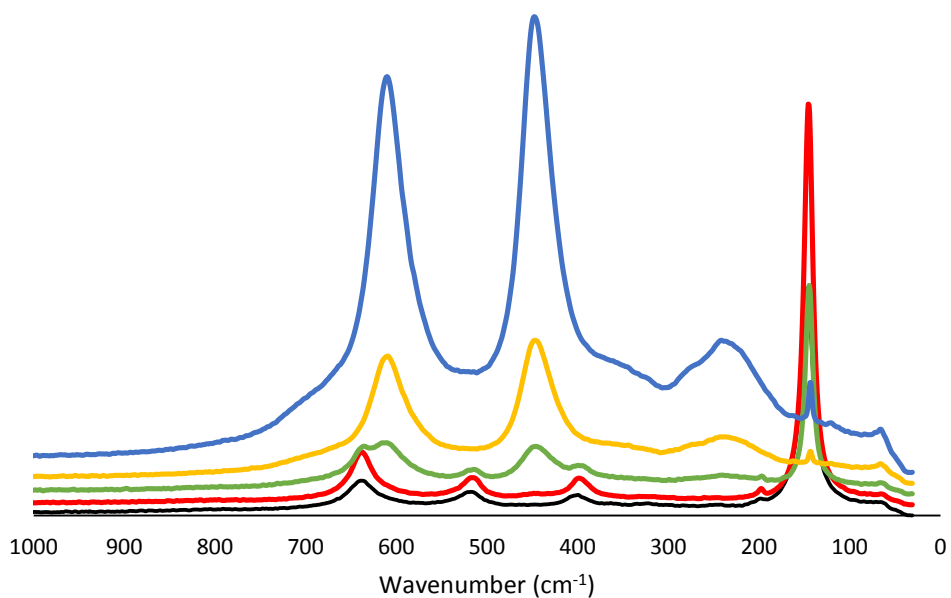

**Figure S5.** Raman spectra of the CuO/La<sub>2</sub>O<sub>3</sub>/TiO<sub>2</sub> calcined at 600 °C (black), 700 °C (red), 800 °C (green), 900 °C (yellow), and 1000 °C (blue). Only anatase and rutile peaks can be observed.

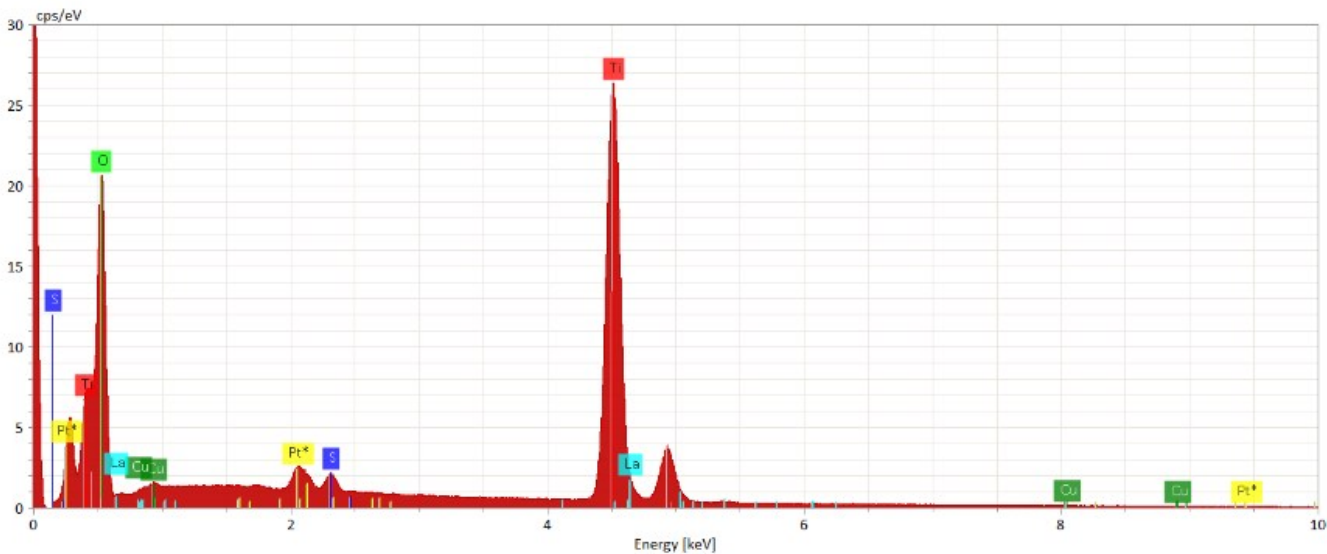

**Figure S6.** EDS spectrum of CuO/La<sub>2</sub>O<sub>3</sub>/TiO<sub>2</sub> that was used for thiol adsorption.

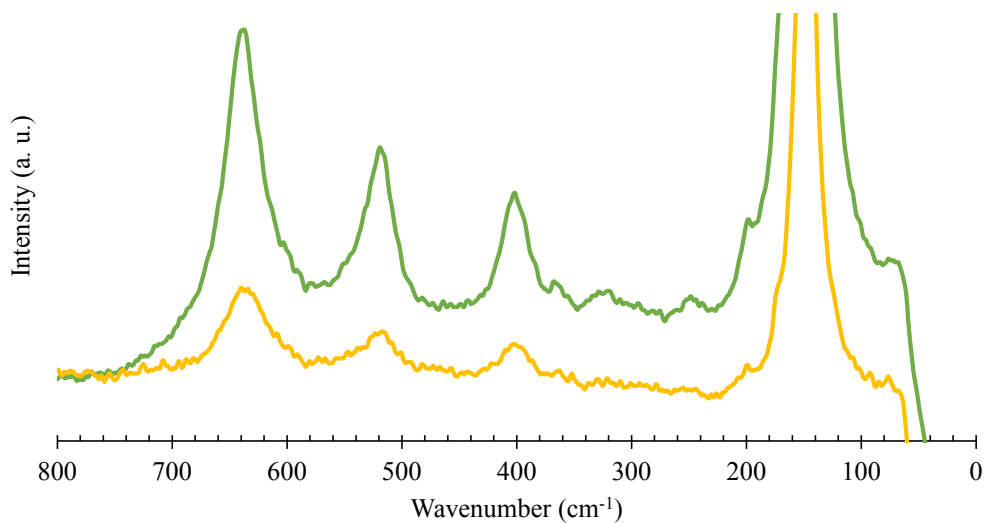

**Figure S7.** Raman spectra of the fresh (green) and used (yellow) CuO/La<sub>2</sub>O<sub>3</sub>/TiO<sub>2</sub> collected using the same parameters. The anatase peak intensities from the used adsorbent are lower than those from the fresh counterpart; a result of the surface covered with the adsorbate molecules.

CuO-La<sub>2</sub>O<sub>3</sub>-TiO<sub>2</sub>

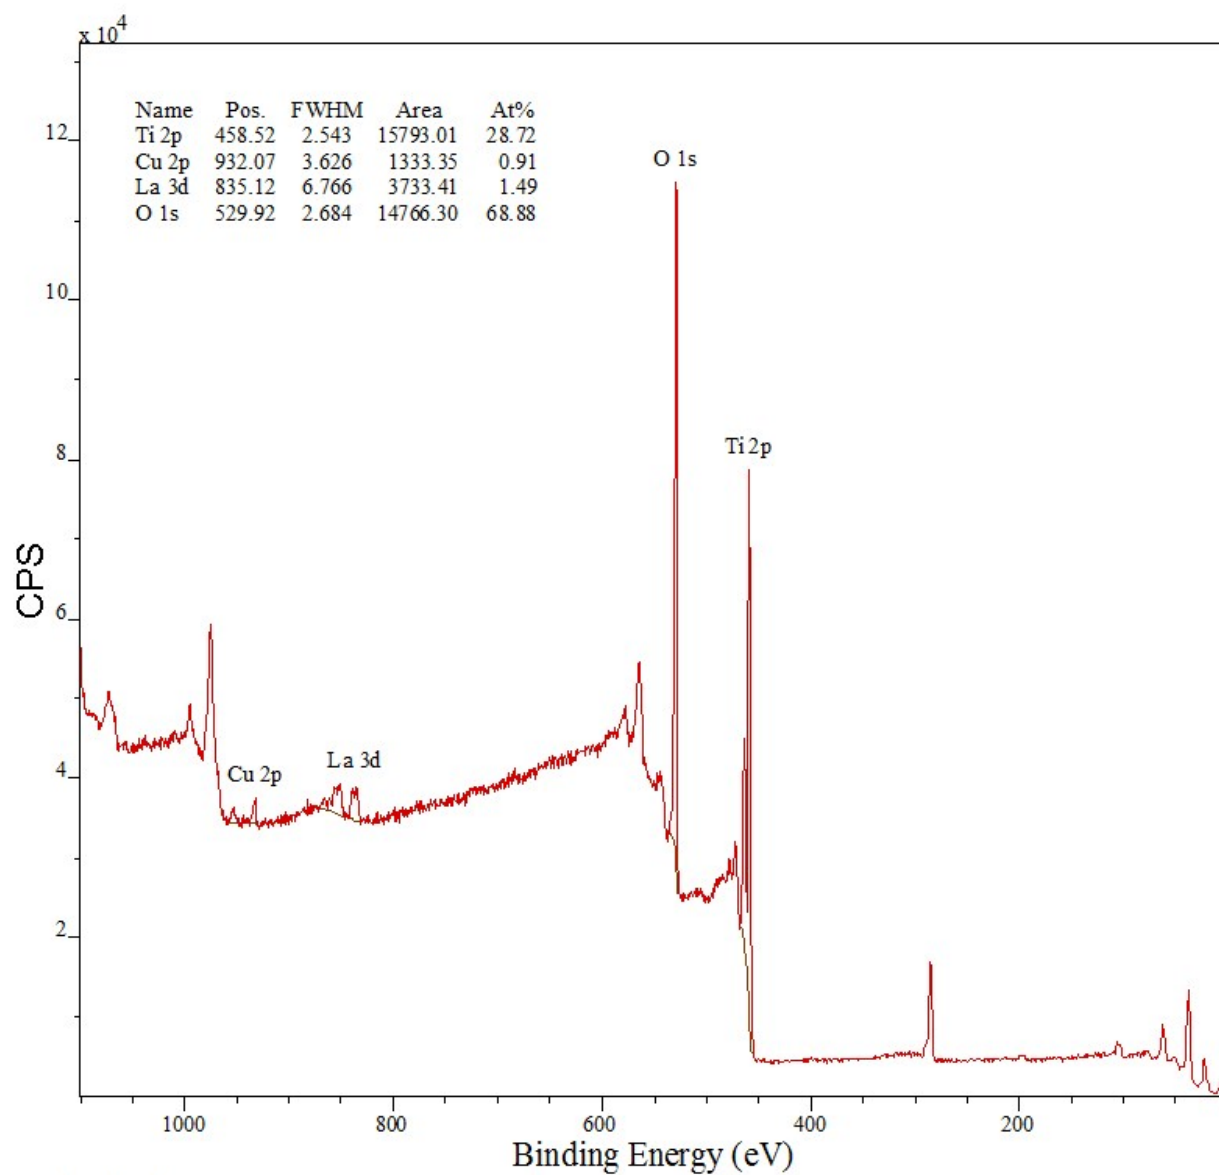

**Figure S8.** XPS scan of the CuO/La<sub>2</sub>O<sub>3</sub>/TiO<sub>2</sub> sample.

Ag<sub>2</sub>O-La<sub>2</sub>O<sub>3</sub>-TiO<sub>2</sub>

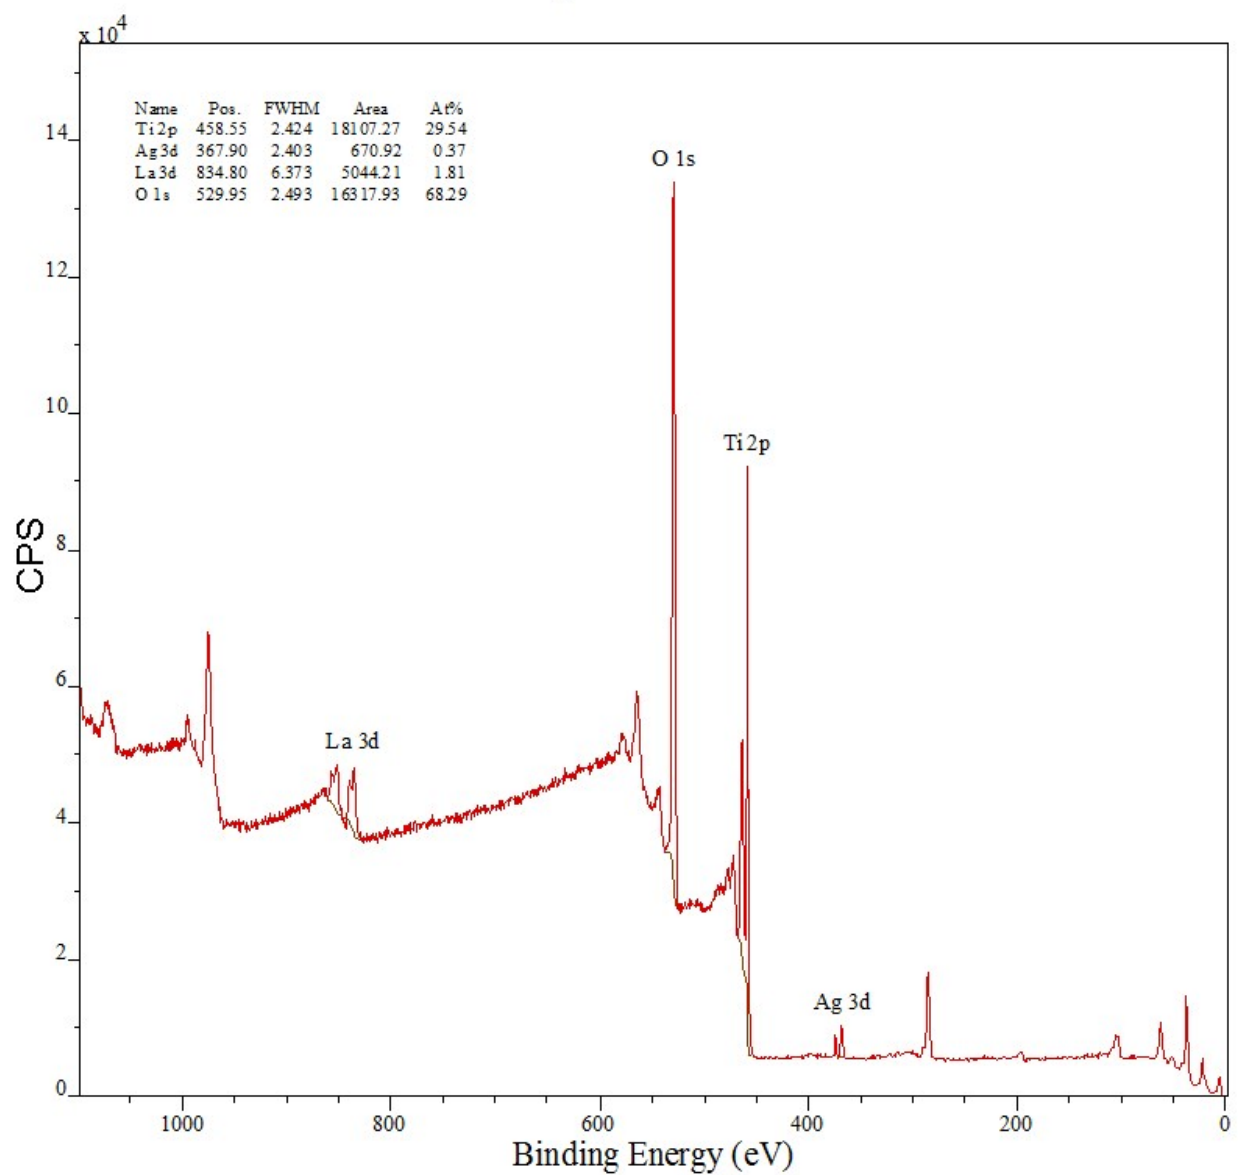

Figure S9. XPS scan of the Ag<sub>2</sub>O/La<sub>2</sub>O<sub>3</sub>/TiO<sub>2</sub> sample.



Au-La<sub>2</sub>O<sub>3</sub>-TiO<sub>2</sub>

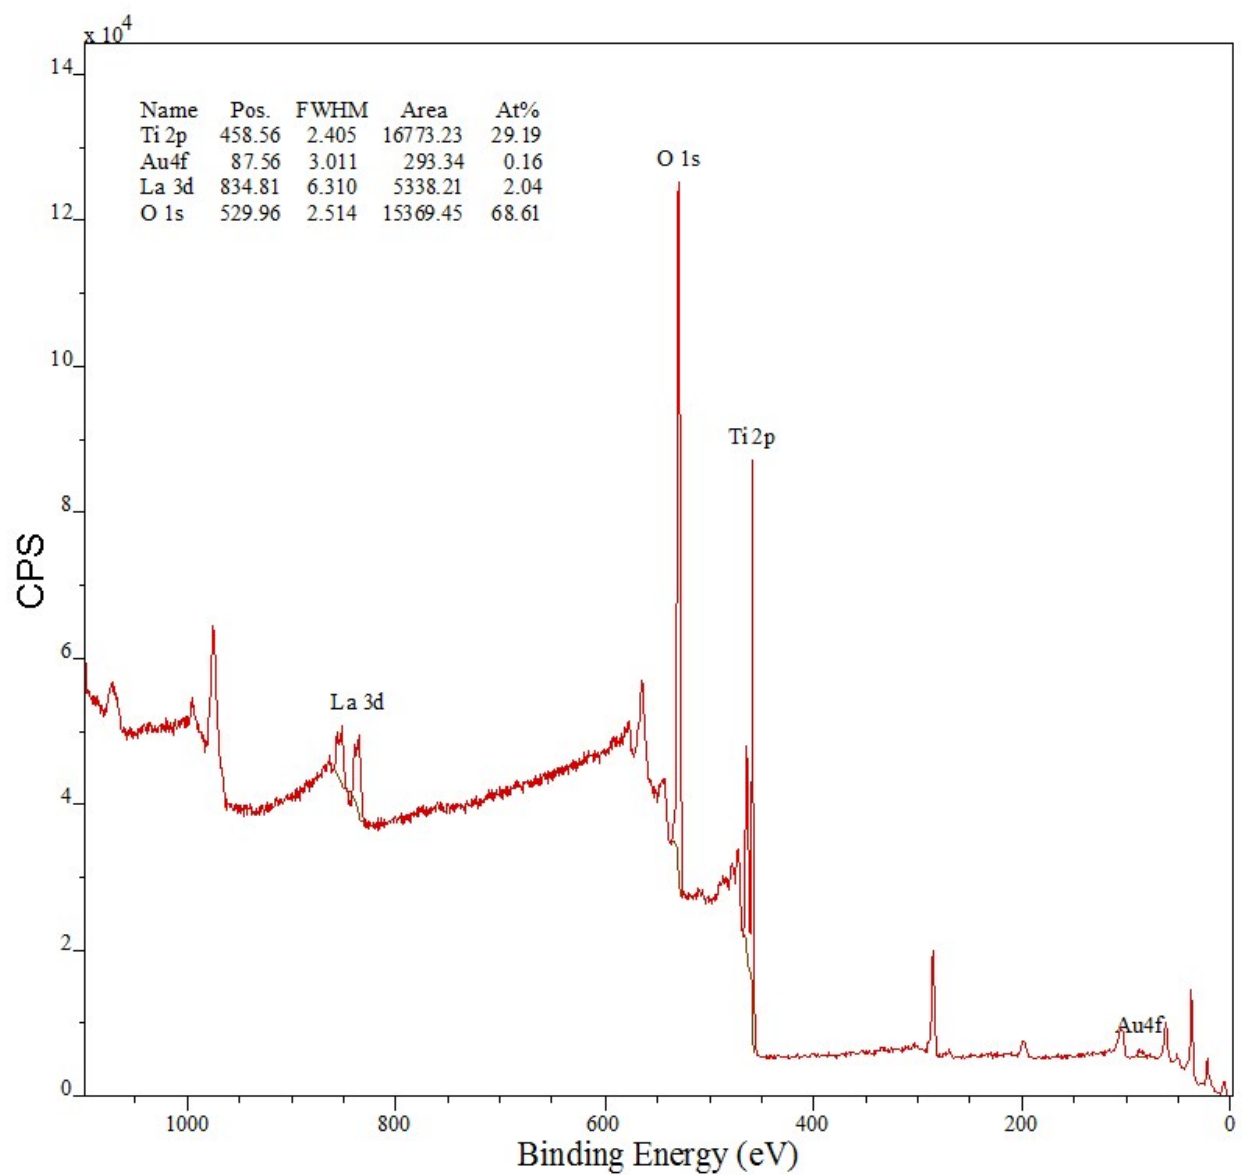

Figure S10. XPS scan of the Au/La<sub>2</sub>O<sub>3</sub>/TiO<sub>2</sub> sample.

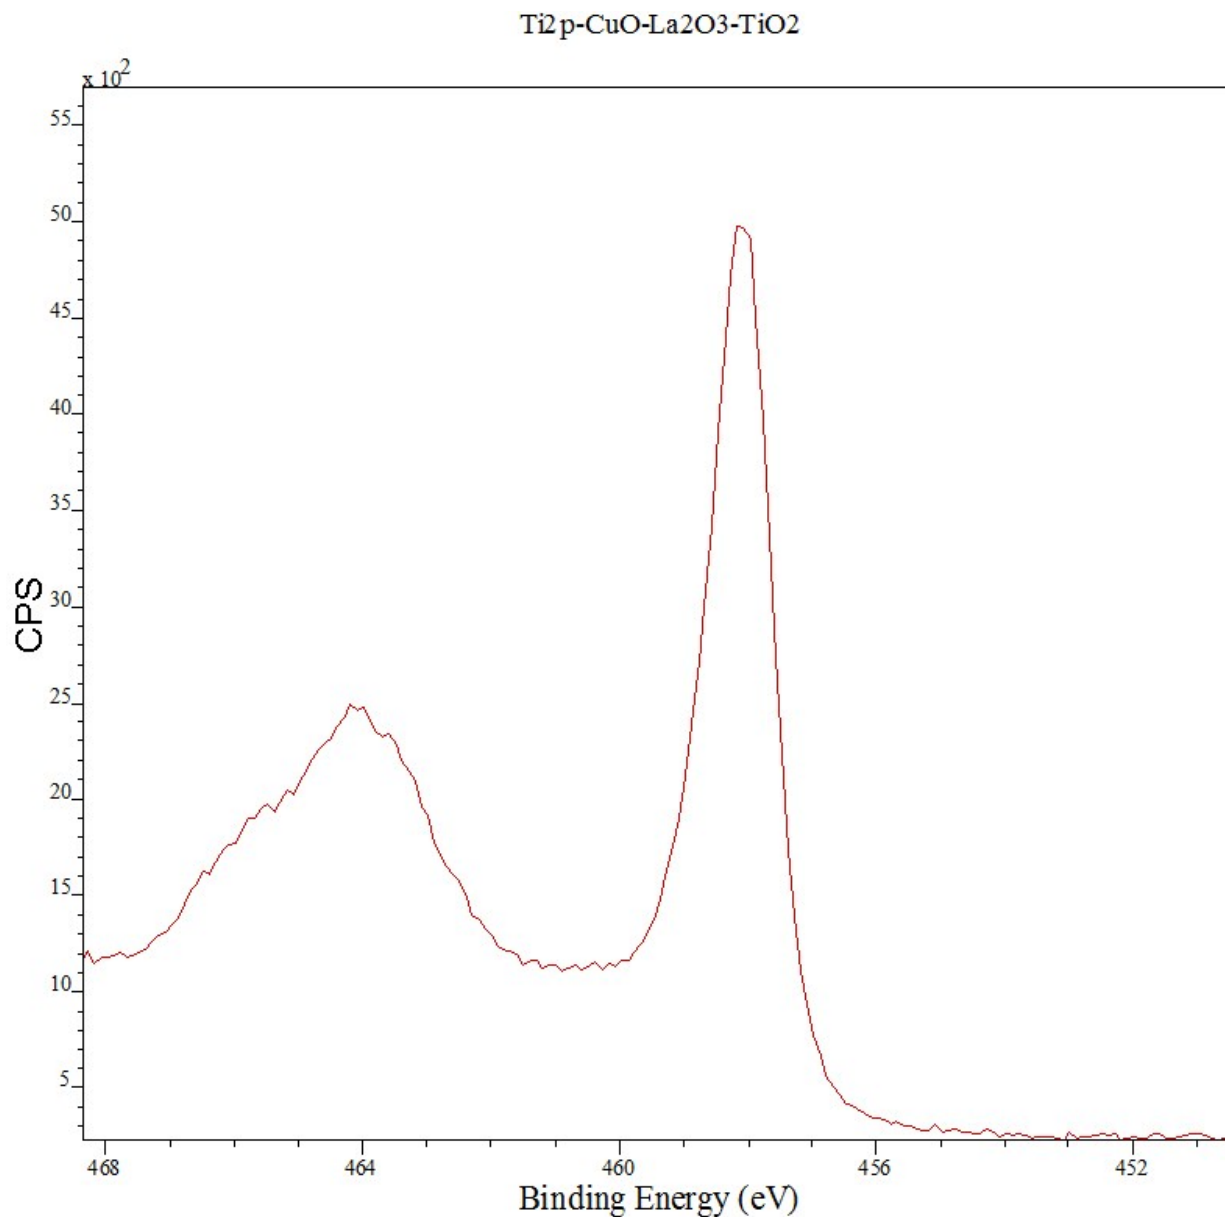

**Figure S11.** High resolution XPS, Ti<sub>2p</sub> of CuO/La<sub>2</sub>O<sub>3</sub>/TiO<sub>2</sub>. For Ti<sub>3p, 3/2</sub>, binding energy = 458.1 eV, FWHM = 1.1 eV. It is noted that the FWHM in this HR XPS is different from the scan in Figure S8.

Ti2p-Ag2O-La2O3-TiO2

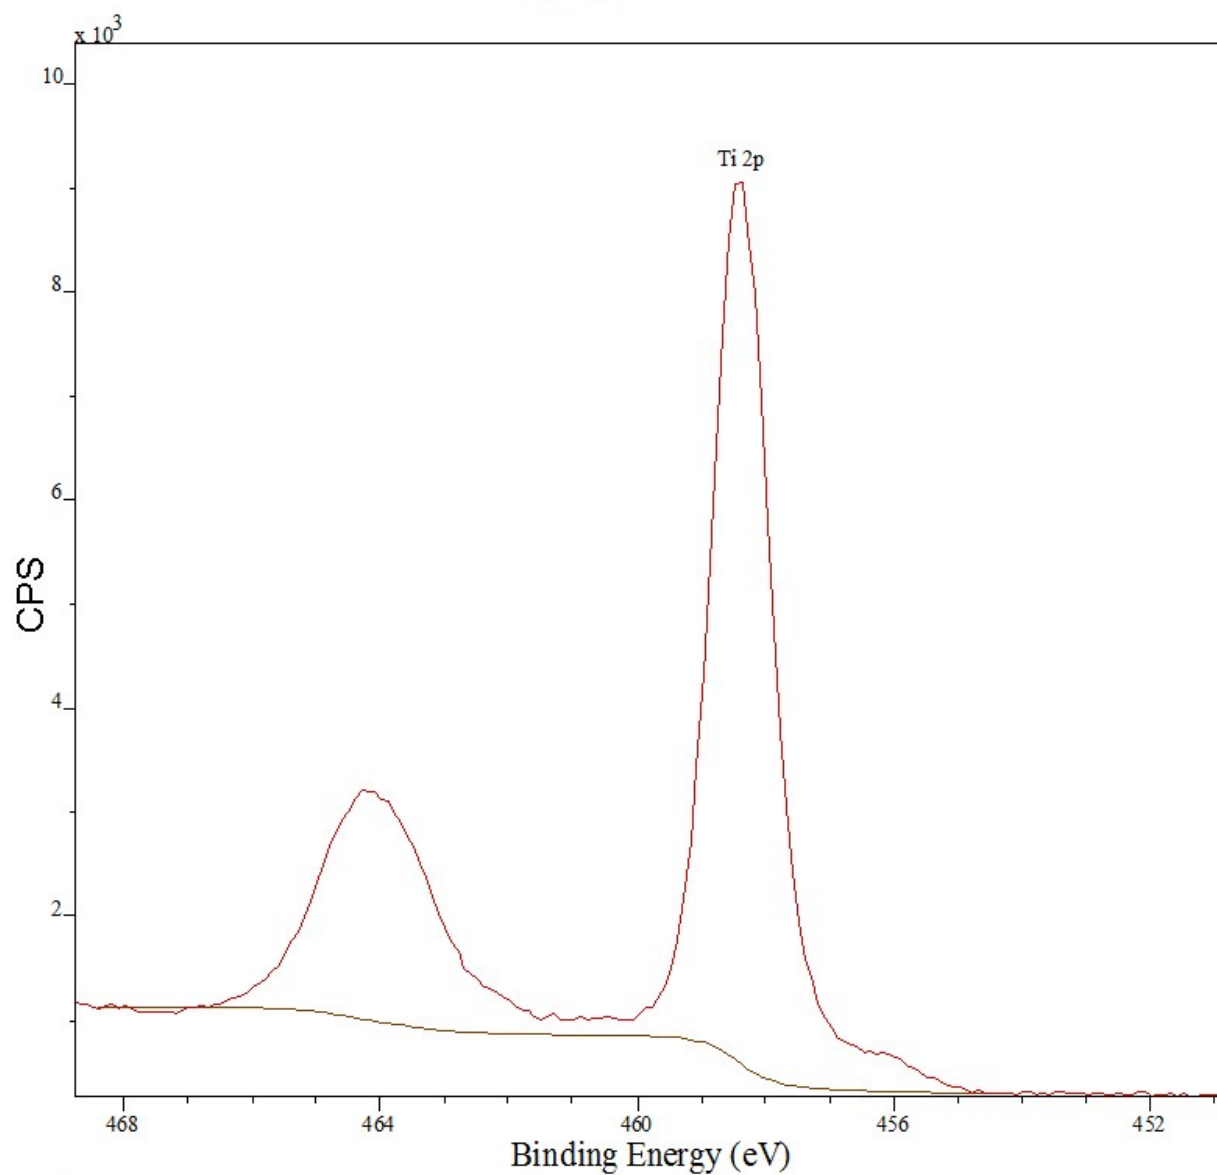

**Figure S12.** High resolution XPS, Ti<sub>2p</sub> of Ag<sub>2</sub>O/La<sub>2</sub>O<sub>3</sub>/TiO<sub>2</sub>. For Ti<sub>3p, 3/2</sub>, binding energy = 458.4 eV, FWHM = 1.0 eV. It is noted that the FWHM in this HR XPS is different from the scan in Figure S9.

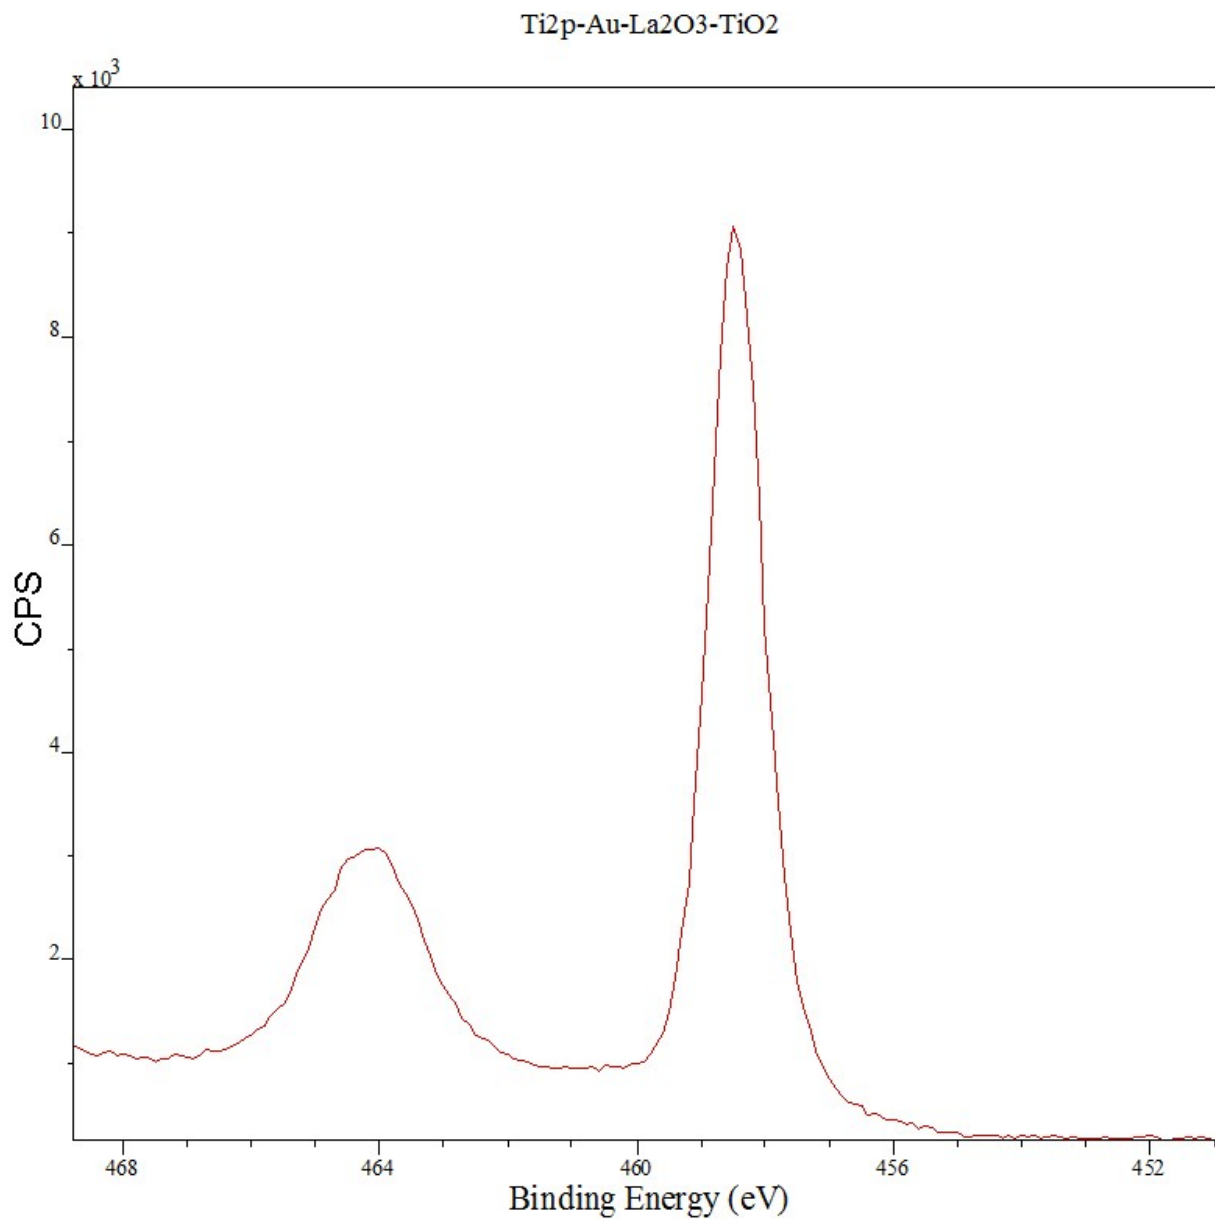

**Figure S13.** High resolution XPS, Ti<sub>2p</sub> of Au/La<sub>2</sub>O<sub>3</sub>/TiO<sub>2</sub>. For Ti<sub>3p, 3/2</sub>, binding energy = 458.5 eV, FWHM = 1.0 eV. It is noted that the FWHM in this HR XPS is different from the scan in Figure S10.

La3d, CuO-La2O3-TiO2

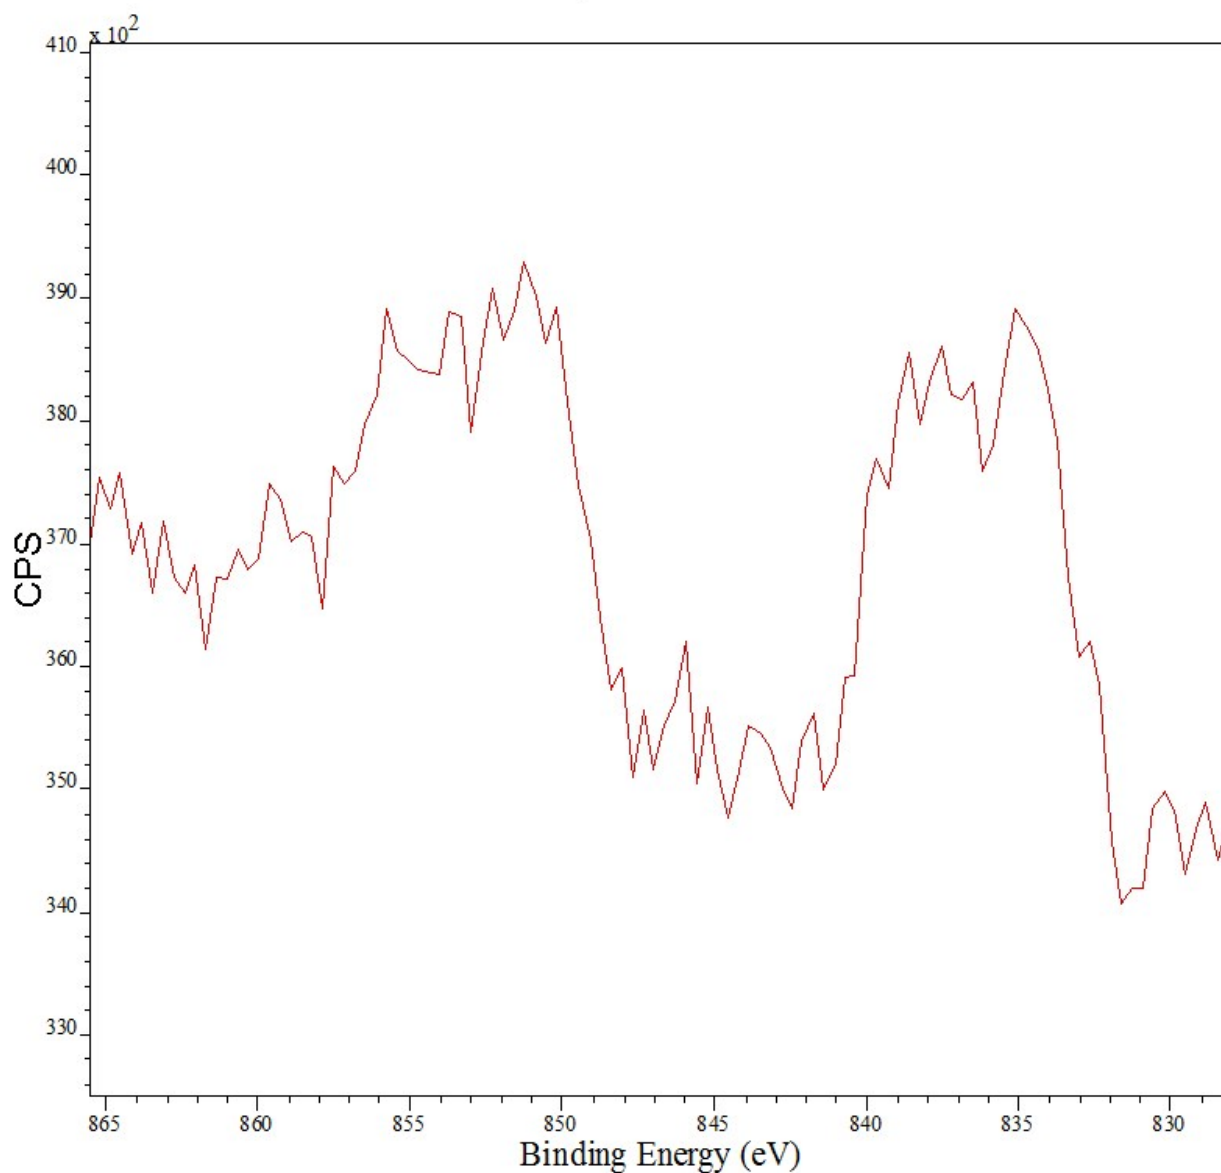

**Figure S14.** La<sub>3p</sub> of CuO/La<sub>2</sub>O<sub>3</sub>/TiO<sub>2</sub>. Binding energy = 834.8 eV, FWHM = 3.5 eV. It is noted that the satellite peaks are not separated well and the FWHM is manually obtained.

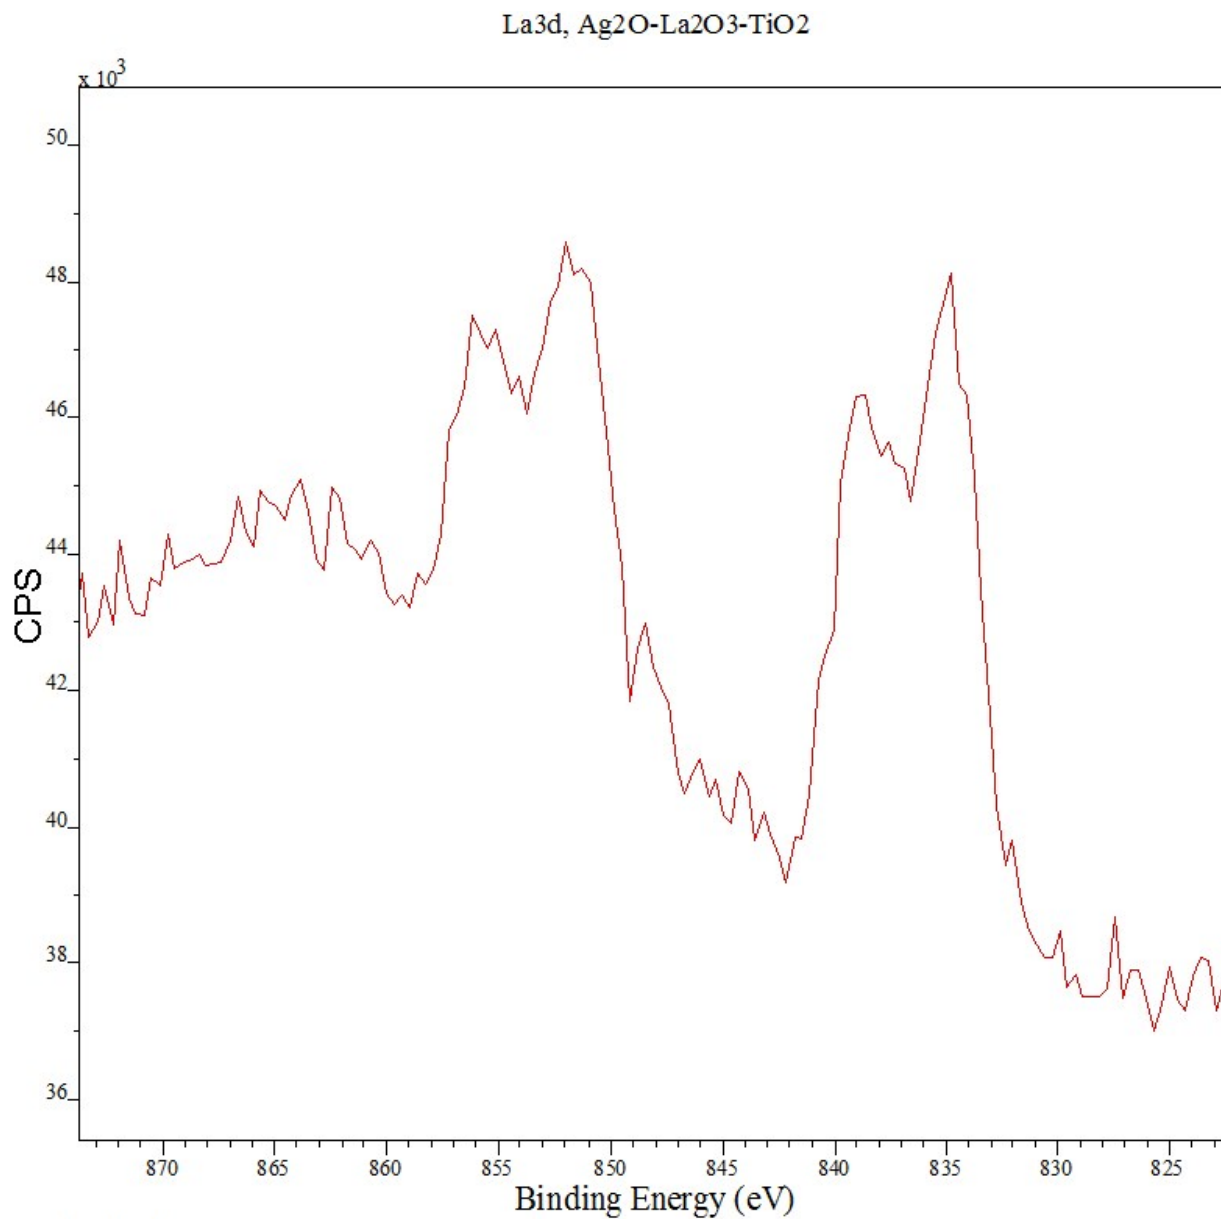

**Figure S15.** La<sub>3p</sub> of Ag<sub>2</sub>O/La<sub>2</sub>O<sub>3</sub>/TiO<sub>2</sub>. Binding energy = 834.6 eV, FWHM = 3.5 eV. It is noted that the satellite peaks are not separated well and the FWHM is manually obtained.

La3d, Au-La2O3-TiO2

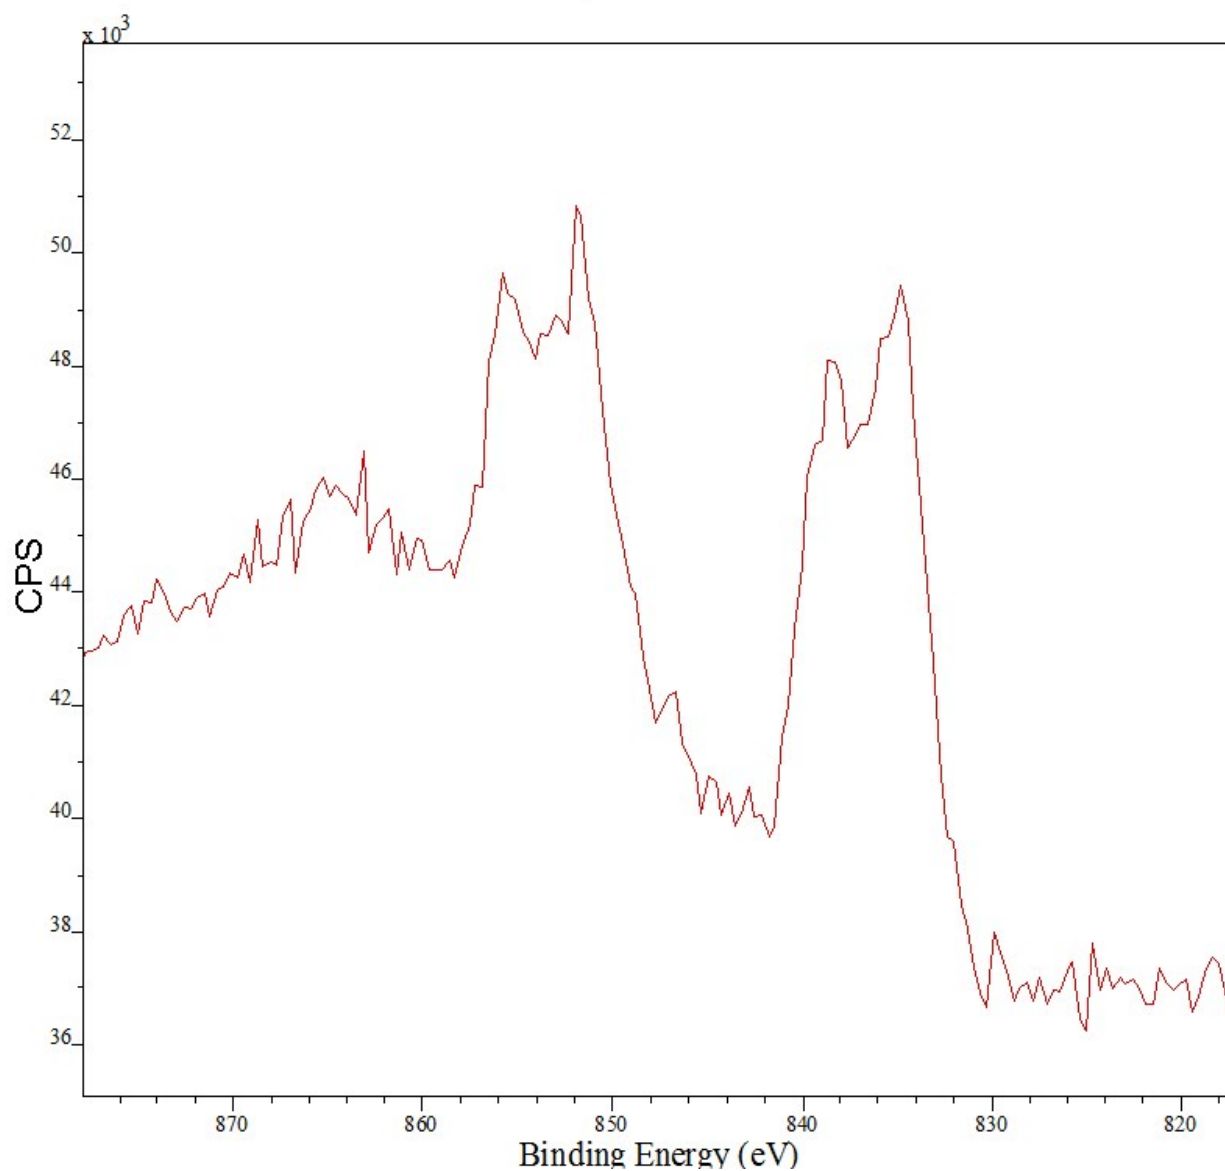

**Figure S16.** La<sub>3p</sub> of Au/La<sub>2</sub>O<sub>3</sub>/TiO<sub>2</sub>. Binding energy = 834.6 eV, FWHM = 3.5 eV. It is noted that the satellite peaks are not separated well and the FWHM is manually obtained.

La3d, La2O3-TiO2

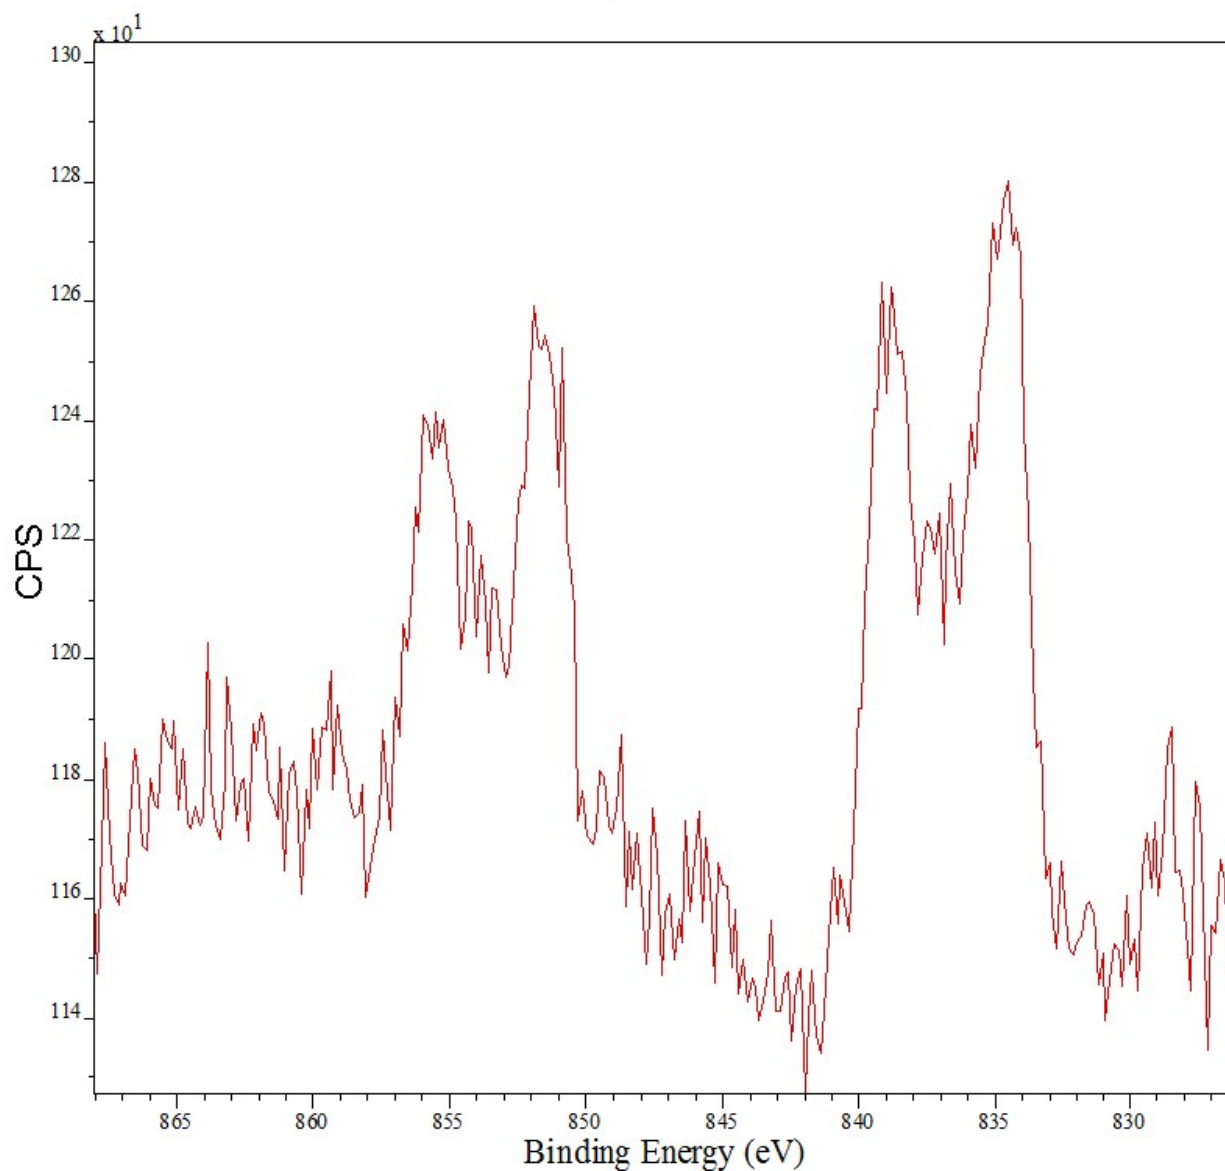

**Figure S17.** La<sub>3p</sub> of La<sub>2</sub>O<sub>3</sub>/TiO<sub>2</sub>. Binding energy = 834.8 eV, FWHM = 2.9 eV. It is noted that the satellite peaks are not separated well and the FWHM is manually obtained.

**Table S1.** Comparison of anatase crystallite sizes of fresh and used adsorbents.

|                                                                    | Fresh $D_{scher}^a$ (nm) | Spent $D_{scher}^b$ (nm) |
|--------------------------------------------------------------------|--------------------------|--------------------------|
| Au/La <sub>2</sub> O <sub>3</sub> /TiO <sub>2</sub>                | 10.7                     | 10.7                     |
| Ag <sub>2</sub> O/La <sub>2</sub> O <sub>3</sub> /TiO <sub>2</sub> | 9.7                      | 9.7                      |
| Cu <sub>2</sub> O/La <sub>2</sub> O <sub>3</sub> /TiO <sub>2</sub> | 9.7                      | 9.7                      |
